# Supplementary material for: Interactive transcriptome analyses of Northern Wild Rice (Zizania palustris L.) and Bipolaris oryzae show convoluted communications during the early stages of fungal brown spot development
Source: Front Plant Sci. 2024 Apr 26;15:1350281. doi: 10.3389/fpls.2024.1350281 (PMC11086184; doi:10.3389/fpls.2024.1350281)
Supplement: Supplementary file 22 [file Table_14.xlsx]

## Sheet: Sheet1
Supplementary Table 14. Selected upregulated-differentialy expressed Bipolaris oryzae genes during colonization of Northern Wild Rice at 24 h and 48 h
Transcript name	Time point of collection				Annotation																	Variance Partition Analysisv
	24 h		48 h		UniProtKB/Swiss-Prot database			B. oryzae Cm_TG12Lb2 isolate		Bipolaris oryzae ATC44560		InterPro (PFAM)				Gene Ontology (GO)
	Log2-Fold Changei	p-value adj	Log2-Fold Changei	p-value adj	Accesion	E-value	Description	Geneii	E-value	Geneiii	E-value	PFAM_ACC	Description	SignalP	KEGG	Biological process	Description	Molecular function	Description	Cellular component	Description	Treatment	Time.Treatment	Effector localization and probability iv
Boip_TRINITY_DN46467_c0_g1	6.90595	9.34e-62	7.96448	5e-95	ACEA_LEPMC	0	Isocitrate lyase	4985_g	0	EUC43645	0	PF00463.22|PF13714.7	Isocitrate lyase family|Phosphoenolpyruvate phosphomutase	.	.	GO:0006097|GO:0006099	glyoxylate cycle|tricarboxylic acid cycle	GO:0004451|GO:0046872|GO:0046421	isocitrate lyase activity|metal ion binding|methylisocitrate lyase activity	GO:0009514	glyoxysome	0.935747	.	.
Boip_TRINITY_DN72040_c0_g1	10.4328	5.64e-49	8.24789	4.74e-57	CIH1_COLLN	2.73e-09	Intracellular hyphae protein 1	2799_g	5.64e-145	EUC44726	5.76e-145	PF01476.21|PF01476.21|PF01476.21	LysM domain|LysM domain|LysM domain	sigP:1	.	.	.	.	.	GO:0005576|GO:0030446	extracellular region|hyphal cell wall	0.841482	.	A (0.959)
TRINITY_DN6010_c0_g1	0.362344	0.496908	3.30345	9.24e-16	ISC1_VERDV	4.01e-72	Secreted isochorismatase effector Isc1	2994_g	1.29e-139	EUC45644	1.31e-139	PF00857.21	Isochorismatase family	.	KEGG:vda:VDAG_05103	GO:0009405	pathogenesis	GO:0008908	isochorismatase activity	GO:0005576|GO:0030430|GO:0042025	extracellular region|host cell cytoplasm|host cell nucleus	.	.	.
TRINITY_DN25113_c0_g1	1.11501	0.0792894	2.28562	0.000343615	NLP10_PHYCP	1.19e-63	NLP effector protein 10	6024_g	1.72e-157	EUC45405	1.76e-157	PF05630.12	Necrosis inducing protein (NPP1)	sigP:1	.	GO:0009405	pathogenesis	.	.	GO:0005576	extracellular region	.	.	.
TRINITY_DN7057_c0_g1	0.856029	0.101584	1.57227	0.00449907	PEVD1_VERDA	3.24e-18	Effector protein PevD1	2655_g	7.11e-92	EUC47683	7.26e-92	PF16541.6	Alternaria alternata allergen 1	sigP:1	.	GO:0034053	modulation by symbiont of host defense-related programmed cell death	.	.	GO:0005576	extracellular region	.	.	A (0.697)
TRINITY_DN2704_c0_g1	5.85985	7.79e-27	6.51503	3.5e-37	TRYP_FUSOX	2.16e-81	Trypsin;	8632_g	2.45e-166	EUC44292	3.91e-166	PF00089.27|PF13365.7	Trypsin|Trypsin-like peptidase domain	sigP:1	.	.	.	GO:0004252	serine-type endopeptidase activity	GO:0005576	extracellular region	0.927262	.	A (0.791)
Boip_TRINITY_DN72667_c0_g1	1.49511	0.106062	10.4944	7.56e-27	.	.	.	8950_g	5.39e-95	EUC41824	5.51e-95	.	.	sigP:1	.	.	.	.	.	.	.	.	0.892152	A/C (0.799/0.791)
Boip_TRINITY_DN32248_c0_g1	4.2104	1.5e-07	6.93209	2.61e-24	RHA1_EMENI	1.91e-51	Rhamnogalacturonan acetylesterase	4971_g	5.56e-174	EUC49318	5.68e-174	PF13472.7	GDSL-like Lipase/Acylhydrolase family	sigP:1	KEGG:ani:AN2528.2|KO:K15530	GO:0045490	pectin catabolic process	GO:0052689|GO:0030599|GO:0046575	carboxylic ester hydrolase activity|pectinesterase activity|rhamnogalacturonan acetylesterase activity	GO:0005576	extracellular region	.	.	A (0.710)
TRINITY_DN11031_c0_g1	-0.100699	0.855701	2.67644	2.15e-20	.	.	.	3012_g	0	EUC45662	0	PF01476.21	LysM domain	.	.	.	.	.	.	.	.	.	.	C (0.857)
Boip_TRINITY_DN91869_c0_g1	5.39951	4.07e-08	7.56537	2.84e-17	AXE1_ASPFI	8.57e-93	Acetylxylan esterase A	7354_g	0	EUC41118	0	PF10503.10	Esterase PHB depolymerase	sigP:1	.	GO:0030245|GO:0045493	cellulose catabolic process|xylan catabolic process	GO:0046555	acetylxylan esterase activity	GO:0005576	extracellular region	.	.	A (0.570)
Boip_TRINITY_DN81041_c0_g1	6.41625	3.57e-12	6.0258	1.99e-16	PLYE_EMENI	1.97e-102	Pectate lyase E	76_g	4.88e-176	EUC39991	4.99e-176	PF03211.14	Pectate lyase	sigP:1	KEGG:ani:AN3337.2|KO:K22539	GO:0071555|GO:0045490	cell wall organization|pectin catabolic process	GO:0030570	pectate lyase activity	GO:0005576	extracellular region	.	.	A(0.861)
TRINITY_DN11708_c0_g1	4.30605	9.45e-21	3.17421	5.87e-15	.	.	.	6133_g	1.79e-82	EUC43323	1.83e-82	.	.	sigP:1	.	.	.	.	.	.	.	0.872159	.	A(0.652)
Boip_TRINITY_DN95426_c0_g1	0	1	10.9066	1.32e-09	PLYF_ASPTN	9.02e-122	Probable pectate lyase F	7484_g	2.85e-176	EUC45465	2.91e-176	PF03211.14	Pectate lyase	sigP:1	.	GO:0071555|GO:0000272	cell wall organization|polysaccharide catabolic process	GO:0030570	pectate lyase activity	GO:0005576	extracellular region	.	.	A (0.935)
TRINITY_DN25460_c0_g1	4.97887	2.44e-13	2.39037	2.14e-05	.	.	.	2310_g	2.4e-96	EUC49950	2.45e-96	.	.	sigP:1	.	.	.	.	.	.	.	.	.	A/C (0.750/0.526)
TRINITY_DN4400_c0_g1vi	-0.854374	0.184542	1.14329	0.00614591	.	.	.	6631_g	7.88e-67	EUC40334	3.76e-58	.	.	sigP:1	.	.	.	.	.	.	.	.	.	C (0.675)
TRINITY_DN12978_c0_g1	1.14874	0.0640375	1.67237	0.00663631	.	.	.	5144_g	1.76e-65	EUC46065	1.8e-65	.	.	sigP:1	.	.	.	.	.	.	.	.	.	C (0.517)
TRINITY_DN17111_c0_g1vi	0.179026	0.631802	0.649294	0.0118692	.	.	.	10708_g	1.46e-143	EUC48944	1.49e-143	.	.	sigP:1	.	.	.	.	.	.	.	.	.	C (0.724)
Boip_TRINITY_DN32473_c0_g1	3.77047	0.0156176	3.32374	0.0156528	.	.	.	777_g	3.6e-86	EUC50691	3.68e-86	.	.	sigP:1	.	.	.	.	.	.	.	.	.	A/C (0.995/0.870)
Boip_TRINITY_DN46786_c0_g1	10.1621	4.51e-37	12.7892	1.21e-59	BOA9_BOTFB	0	Reducing polyketide synthase BOA9	2466_g	0	EUC39811	1.36e-73	PF00109.27|PF02801.23|PF16197.6|PF00698.22|PF14765.7	Beta-ketoacyl synthase, N-terminal domain|Beta-ketoacyl synthase, C-terminal domain|Ketoacyl-synthetase C-terminal extension|Acyl transferase domain|Polyketide synthase dehydratase	.	.	GO:0009405	pathogenesis	GO:0016491|GO:0016746	oxidoreductase activity|transferase activity, transferring acyl groups	.	.	.	.	.
TRINITY_DN5204_c0_g1	1.55818	0.00834609	2.88259	1.88e-08	TES_ALTAL	0	Nonribosomal peptide synthetase TES	3163_g	0	EUC39879	2.93e-44	PF00501.29	AMP-binding enzyme	.	.	GO:0009405	pathogenesis	GO:0016853|GO:0016874|GO:0031177	isomerase activity|ligase activity|phosphopantetheine binding	.	.	0.765334	.	.
Boip_TRINITY_DN72431_c0_g1	6.5437	4.94e-08	6.88342	9.3e-12	NHG1_PSEPU	3e-19	Salicylate hydroxylase	7642_g	3.68e-156	EUC40584	3.75e-156	PF01494.20	FAD binding domain	.	KEGG:ag:AAA25897|KO:K00480	GO:0019439	aromatic compound catabolic process	GO:0071949|GO:0018658	FAD binding|salicylate 1-monooxygenase activity	.	.	.	.	.
Boip_TRINITY_DN82009_c0_g1	6.734	9.93e-23	7.87538	3.31e-38	MCPB_TRIEQ	6.77e-109	Carboxypeptidase 2	6849_g	0	EUC47026	0	PF00246.25	Zinc carboxypeptidase	.	.	GO:0009405	pathogenesis	GO:0004181|GO:0008270	metallocarboxypeptidase activity|zinc ion binding	GO:0005576	extracellular region	0.842665	.	.
Boip_TRINITY_DN74301_c0_g1	3.43667	0.00624711	7.23617	7.5e-21	MCPAL_ARTOC	5.92e-61	Metallocarboxypeptidase A-like protein MCYG_01475	5145_g	1.16e-175	EUC46063	0	PF00246.25	Zinc carboxypeptidase	sigP:1	.	GO:0009405	pathogenesis	GO:0004181|GO:0008270	metallocarboxypeptidase activity|zinc ion binding	GO:0005576	extracellular region	.	0.772192	.
Boip_TRINITY_DN63292_c0_g1	5.96276	7.3e-19	7.00653	4.05e-30	MCPA_TRIVH	1.7e-122	Probable metallocarboxypeptidase A	9982_g	0	EUC48205	0	PF00246.25	Zinc carboxypeptidase	sigP:1	KEGG:tve:TRV_07931|KO:K01298	GO:0009405	pathogenesis	GO:0004181|GO:0008270	metallocarboxypeptidase activity|zinc ion binding	GO:0005576	extracellular region	0.806572	.	.
Boip_TRINITY_DN78524_c0_g1	9.1486	5.22e-31	6.00051	1.74e-19	LAP2_ASPFU	1.16e-80	Probable leucine aminopeptidase 2	7386_g	1.95e-140	EUC40043	2e-140	.	.	.	KEGG:afm:AFUA_3G00650|KO:K01302	GO:0009405|GO:0006508	pathogenesis|proteolysis	GO:0004177|GO:0046872|GO:0008237	aminopeptidase activity|metal ion binding|metallopeptidase activity	GO:0005576	extracellular region	.	.	.
TRINITY_DN14217_c0_g1	4.83703	7.55e-17	4.60909	5.57e-26	DPP4_ASPFC	2.12e-80	Probable dipeptidyl peptidase 4	2501_g	1.98e-138	EUC41728	2.02e-138	PF00930.22	Dipeptidyl peptidase IV (DPP IV) N-terminal region	.	.	GO:0009405	pathogenesis	GO:0004177|GO:0008236	aminopeptidase activity|serine-type peptidase activity	GO:0005576	extracellular region	.	.	.
TRINITY_DN20249_c0_g1	-0.278953	0.622266	4.49131	6.51e-12	SCPB_ARTOC	2.82e-81	Carboxypeptidase S1 homolog B	6146_g	0	EUC43312	0	PF00450.23	Serine carboxypeptidase	.	.	GO:0009405	pathogenesis	GO:0004185	serine-type carboxypeptidase activity	GO:0031225|GO:0005886	anchored component of membrane|plasma membrane	.	0.809905	.
TRINITY_DN11374_c0_g1	2.9996	3.24e-12	3.95737	1.64e-31	MEP_PYRTR	0	Extracellular metalloproteinase	6193_g	0	EUC41029	0	PF07504.14|PF02128.16	Fungalysin/Thermolysin Propeptide Motif|Fungalysin metallopeptidase (M36)	.	.	.	.	GO:0004222|GO:0008270	metalloendopeptidase activity|zinc ion binding	GO:0005615	extracellular space	0.865818	.	.
TRINITY_DN22434_c0_g1	1.74429	0.0466063	3.34996	1.2e-09	SED4_ARTOC	1.36e-58	Tripeptidyl-peptidase SED4	3704_g	2.09e-124	EUC49362	2.13e-124	.	.	.	.	GO:0009405	pathogenesis	GO:0046872|GO:0004252	metal ion binding|serine-type endopeptidase activity	GO:0005615	extracellular space	.	.	.
TRINITY_DN5966_c0_g1	0.229327	0.691345	3.33107	1.54e-05	MCPA_TRIRU	2.02e-69	Metallocarboxypeptidase A	2929_g	2.15e-144	EUC48112	2.2e-144	PF00246.25	Zinc carboxypeptidase	.	.	GO:0009405	pathogenesis	GO:0004181|GO:0008270	metallocarboxypeptidase activity|zinc ion binding	GO:0005576	extracellular region	.	.	.
TRINITY_DN8970_c0_g1	0.700695	0.303218	1.82389	0.0429738	SCPB_ARTBC	6.18e-30	Carboxypeptidase S1 homolog B	586_g	7.3e-115	EUC44068	7.45e-115	PF00450.23	Serine carboxypeptidase	.	KEGG:abe:ARB_06019	GO:0009405	pathogenesis	GO:0004185	serine-type carboxypeptidase activity	GO:0031225|GO:0005886	anchored component of membrane|plasma membrane	.	.	.
Boip_TRINITY_DN80977_c0_g1	0.0659823	0.912897	4.51595	3e-32	ABA2_BOTFU	1.97e-62	Cytochrome P450 monooxygenase abl2	10459_g	1.23e-159	EUC46583	1.25e-159	PF00067.23	Cytochrome P450	.	.	GO:0009405	pathogenesis	GO:0020037|GO:0005506|GO:0004497|GO:0016705	heme binding|iron ion binding|monooxygenase activity|oxidoreductase activity, acting on paired donors, with incorporation or reduction of molecular oxygen	GO:0016021	integral component of membrane	.	0.970471	.
TRINITY_DN10713_c0_g1	2.52771	3.44e-38	1.62163	1.67e-24	OPS4_BEAB2	8.72e-31	FAD-dependent monooxygenase OpS4	3833_g	0	EUC42105	0	PF01494.20|PF13450.7	FAD binding domain|NAD(P)-binding Rossmann-like domain	.	.	GO:0009405	pathogenesis	GO:0071949|GO:0004497	FAD binding|monooxygenase activity	.	.	.	.	.
TRINITY_DN22055_c0_g1	2.93187	1.27e-06	4.20237	1.81e-14	CP53_ASPNG	0	Benzoate 4-monooxygenase	8068_g	0	EUC50951	0	PF00067.23	Cytochrome P450	.	.	GO:0055114	oxidation-reduction process	GO:0018664|GO:0020037|GO:0005506	benzoate 4-monooxygenase activity|heme binding|iron ion binding	GO:0043231	intracellular membrane-bounded organelle	0.841612	.	.
Boip_TRINITY_DN14590_c0_g1	8.86584	8.89e-129	12.1938	0	HPXO_ACIAD	9.82e-24	FAD-dependent urate hydroxylase	9653_g	0	EUC42274	0	PF01494.20|PF13450.7	FAD binding domain|NAD(P)-binding Rossmann-like domain	.	KEGG:aci:ACIAD3540|KO:K16839	GO:0055114|GO:0006144|GO:0019628	oxidation-reduction process|purine nucleobase metabolic process|urate catabolic process	GO:0071949|GO:0102099|GO:0070404|GO:0070402|GO:0016709	FAD binding|FAD-dependent urate hydroxylase activity|NADH binding|NADPH binding|oxidoreductase activity, acting on paired donors, with incorporation or reduction of molecular oxygen, NAD(P)H as one donor, and incorporation of one atom of oxygen	.	.	.	.	.
Boip_TRINITY_DN64406_c0_g1	8.64731	6.9e-74	12.2485	1.35e-179	DEP4_ALTBR	3.36e-75	FAD-dependent monooxygenase DEP4	9651_g	0	EUC42276	0	PF07992.15|PF00743.20|PF13738.7|PF13450.7|PF13434.7	Pyridine nucleotide-disulphide oxidoreductase|Flavin-binding monooxygenase-like|Pyridine nucleotide-disulphide oxidoreductase|NAD(P)-binding Rossmann-like domain|L-lysine 6-monooxygenase (NADPH-requiring)	.	.	.	.	GO:0004497	monooxygenase activity	.	.	.	.	.
TRINITY_DN1110_c0_g1	0.75233	0.0150227	1.68398	1.66e-14	ATRR_ASPOR	1.79e-25	ABC-transporter-regulating transcription factor	1601_g	0	EUC46996	0	PF00172.19|PF04082.19	Fungal Zn(2)-Cys(6) binuclear cluster domain|Fungal specific transcription factor domain	.	KEGG:aor:AO090026000614	GO:0009405|GO:0006351	pathogenesis|transcription, DNA-templated	GO:0003677|GO:0000981|GO:0008270	DNA binding|DNA-binding transcription factor activity, RNA polymerase II-specific|zinc ion binding	GO:0042025|GO:0016021|GO:0005634	host cell nucleus|integral component of membrane|nucleus	.	.	.
TRINITY_DN4808_c0_g1	0.400629	0.276525	1.70011	1.98e-18	LAEA_COCH5	7.47e-15	Secondary metabolism regulator LAE1	5269_g	0	EUC43154	0	PF13489.7|PF05175.15|PF13649.7|PF02390.18	Methyltransferase domain|Methyltransferase small domain|Methyltransferase domain|Putative methyltransferase	.	.	GO:0032259|GO:0009405|GO:0030435	methylation|pathogenesis|sporulation resulting in formation of a cellular spore	GO:0008168	methyltransferase activity	GO:0005634	nucleus	.	.	.
TRINITY_DN19014_c0_g1	0.777011	0.0402705	2.06001	3.02e-14	AMTR1_ALTAL	0	Transcription activator AMTR1	1907_g	0	EUC47710	0	PF00172.19|PF11951.9	Fungal Zn(2)-Cys(6) binuclear cluster domain|Fungal specific transcription factor domain	.	.	GO:0009405	pathogenesis	GO:0003677|GO:0000981|GO:0008270	DNA binding|DNA-binding transcription factor activity, RNA polymerase II-specific|zinc ion binding	GO:0042025|GO:0005634	host cell nucleus|nucleus	.	.	.
Boip_TRINITY_DN47430_c0_g1	-0.218246	0.69956	5.68633	5.54e-19	AM122_ALTAL	9.01e-46	AM-toxin biosynthesis protein 12-2	8079_g	1.06e-07	EUC39654	0	PF00172.19	Fungal Zn(2)-Cys(6) binuclear cluster domain	.	.	GO:0009405	pathogenesis	.	.	.	.	.	0.883658	.
TRINITY_DN12418_c0_g1	3.11988	3.12e-11	2.39659	4.55e-11	SAT4_STACB	2.28e-06	Satratoxin biosynthesis SC1 cluster protein 4	6325_g	0	EUC45759	0	.	.	.	.	.	.	.	.	GO:0016021	integral component of membrane	.	.	.
Boip_TRINITY_DN55400_c0_g1	8.13306	4.94e-39	11.3093	2.82e-40	.	.	.	11437_g	2.91e-147	EUC43984	0	PF11807.9	Mycotoxin biosynthesis protein UstYa	.	.	.	.	.	.	.	.	.	.	.
Boip_TRINITY_DN46512_c0_g1	4.49431	0.00622596	9.67087	2.36e-20	AFLJ_ASPPU	1.75e-32	Versiconal hemiacetal acetate esterase	11190_g	8.22e-98	EUC50682	8.59e-130	PF00135.29|PF07859.14	Carboxylesterase family|alpha/beta hydrolase fold	.	KEGG:ag:AAS66011|KO:K17648	GO:0045122	aflatoxin biosynthetic process	GO:0052689|GO:0140397	carboxylic ester hydrolase activity|versiconal hemiacetal acetate esterase activity	.	.	.	0.986354	.
Boip_TRINITY_DN67225_c0_g1	2.04423	0.0498745	9.49556	1.96e-16	AFLW_ASPPU	3.91e-37	FAD-binding monooxygenase aflW	11183_g	8.11e-142	EUC50673	7.93e-142	PF00743.20|PF13454.7|PF13450.7	Flavin-binding monooxygenase-like|FAD-NAD(P)-binding|NAD(P)-binding Rossmann-like domain	.	.	GO:0045122	aflatoxin biosynthetic process	GO:0050660|GO:0004499|GO:0050661	flavin adenine dinucleotide binding|N,N-dimethylaniline monooxygenase activity|NADP binding	.	.	.	.	.
Boip_TRINITY_DN46391_c0_g1	8.1735	3.31e-45	8.62797	7.84e-59	OMTB_ASPFN	7.62e-66	Demethylsterigmatocystin 6-O-methyltransferase	7552_g	0	EUC41460	0	PF00891.19	O-methyltransferase domain	.	KEGG:afv:AFLA_139220|KO:K17649	GO:0045122|GO:0032259	aflatoxin biosynthetic process|methylation	GO:0047145	demethylsterigmatocystin 6-O-methyltransferase activity	.	.	0.86638	.	.
Boip_TRINITY_DN71758_c0_g1	10.7927	1.33e-210	10.0402	2.05e-215	BGLG_ASPOR	0	Probable beta-glucosidase G	9079_g	0	EUC48608	0	PF00933.22|PF01915.23|PF14310.7	Glycosyl hydrolase family 3 N terminal domain|Glycosyl hydrolase family 3 C-terminal domain|Fibronectin type III-like domain	sigP:1	KEGG:aor:AO090038000223|KO:K05349	GO:0005975|GO:0030245	carbohydrate metabolic process|cellulose catabolic process	GO:0008422|GO:0102483	beta-glucosidase activity|scopolin beta-glucosidase activity	GO:0005615	extracellular space	0.994676	.	.
TRINITY_DN2527_c0_g1	2.20342	2.92e-08	4.30292	1.19e-118	BGLM_ASPNC	0	Probable beta-glucosidase M	6302_g	0	EUC40058	0	PF00933.22|PF01915.23|PF14310.7	Glycosyl hydrolase family 3 N terminal domain|Glycosyl hydrolase family 3 C-terminal domain|Fibronectin type III-like domain	.	KEGG:ang:ANI_1_24094|KO:K05349	GO:0030245	cellulose catabolic process	GO:0008422|GO:0102483	beta-glucosidase activity|scopolin beta-glucosidase activity	GO:0005576	extracellular region	.	.	.
Boip_TRINITY_DN92117_c0_g1	6.00042	3.37e-73	5.70728	2.94e-75	BGLA_ASPTE	0	Probable beta-glucosidase A	3673_g	0	EUC49394	0	PF00933.22|PF01915.23|PF14310.7	Glycosyl hydrolase family 3 N terminal domain|Glycosyl hydrolase family 3 C-terminal domain|Fibronectin type III-like domain	.	.	GO:0030245	cellulose catabolic process	GO:0008422|GO:0102483	beta-glucosidase activity|scopolin beta-glucosidase activity	GO:0005576	extracellular region	0.981131	.	.
TRINITY_DN22428_c0_g1	6.83994	0.000133191	5.71093	0.0021093	EGLD_ASPOR	2.39e-37	Probable endo-beta-1,4-glucanase D	1284_g	1.45e-154	EUC48914	1.48e-154	PF03443.15	Glycosyl hydrolase family 61	.	.	GO:0030245	cellulose catabolic process	GO:0008810|GO:0030248	cellulase activity|cellulose binding	GO:0005576	extracellular region	.	.	A (0.616)
TRINITY_DN15569_c0_g1	3.64312	1.54e-33	4.89662	1.36e-84	CHIB1_ASPFU	1.15e-108	Endochitinase B1	3706_g	0	EUC49360	0	PF00704.29	Glycosyl hydrolases family 18	sigP:1	KEGG:afm:AFUA_8G01410|KO:K01183	GO:0006032|GO:0000272	chitin catabolic process|polysaccharide catabolic process	GO:0008061|GO:0004568|GO:0016757	chitin binding|chitinase activity|transferase activity, transferring glycosyl groups	GO:0005576	extracellular region	.	.	.
Boip_TRINITY_DN36777_c0_g1	6.74001	2.54e-57	7.47214	2.12e-77	SACC_BACSU	2.02e-26	Levanase	12133_g	0	EUC49688	0	PF00251.21|PF08244.13	Glycosyl hydrolases family 32 N-terminal domain|Glycosyl hydrolases family 32 C terminal	sigP:1	KEGG:bsu:BSU27030|KO:K03332	GO:0005987	sucrose catabolic process	GO:0004564|GO:0051669|GO:0004575	beta-fructofuranosidase activity|fructan beta-fructosidase activity|sucrose alpha-glucosidase activity	GO:0005576	extracellular region	0.966577	.	.
TRINITY_DN25192_c0_g1	4.61487	3.38e-65	4.30629	8.36e-74	GH5FP_CHAOB	1.15e-38	Glycosyl hydrolase 5 family protein	2461_g	0	EUC42836	0	PF00150.19	Cellulase (glycosyl hydrolase family 5)	sigP:1	.	GO:0005975	carbohydrate metabolic process	GO:0004553	hydrolase activity, hydrolyzing O-glycosyl compounds	.	.	0.936216	.	.
Boip_TRINITY_DN42026_c0_g1	9.1584	2.07e-61	9.17648	1.16e-69	EGLD_NEOFI	4.61e-19	Probable endo-beta-1,4-glucanase D	8728_g	8.5e-174	EUC40396	8.68e-174	PF03443.15|PF00734.19	Glycosyl hydrolase family 61|Fungal cellulose binding domain	sigP:1	KEGG:nfi:NFIA_099510|KO:K19356	GO:0030245	cellulose catabolic process	GO:0008810|GO:0030248	cellulase activity|cellulose binding	GO:0005576	extracellular region	0.961547	.	.
Boip_TRINITY_DN32282_c0_g1	9.11246	5.13e-60	8.66944	2.1e-62	AGAL2_HYPJE	0	Alpha-galactosidase 2	3708_g	0	EUC49357	0	PF16875.6|PF02065.19|PF16874.6	Glycosyl hydrolase family 36 N-terminal domain|Melibiase|Glycosyl hydrolase family 36 C-terminal domain	.	.	GO:0016052	carbohydrate catabolic process	GO:0004557|GO:0052692	alpha-galactosidase activity|raffinose alpha-galactosidase activity	GO:0005576	extracellular region	0.954526	.	.
Boip_TRINITY_DN52053_c0_g1	0.731076	0.316454	7.86734	7.14e-09	XYN1_GIBZE	4.33e-156	Endo-1,4-beta-xylanase 1	3927_g	0	EUC45305	0	PF00331.21	Glycosyl hydrolase family 10	.	KEGG:fgr:FGSG_06445|KO:K01181	GO:0009405|GO:0045493	pathogenesis|xylan catabolic process	GO:0031176	endo-1,4-beta-xylanase activity	GO:0005576	extracellular region	.	0.786522	.
Boip_TRINITY_DN82742_c0_g1	7.34579	6.19e-25	9.08653	1.78e-43	XYN1_COCCA	5.84e-122	Endo-1,4-beta-xylanase I	8238_g	1.93e-124	EUC50601	1.97e-124	PF00457.18	Glycosyl hydrolases family 11	.	.	GO:0045493	xylan catabolic process	GO:0031176	endo-1,4-beta-xylanase activity	GO:0005576	extracellular region	0.79871	.	.
Boip_TRINITY_DN93599_c0_g1	5.69037	2.96e-09	5.5382	3.44e-11	XYNA_FUSO4	2.16e-66	Endo-1,4-beta-xylanase A	1272_g	6.33e-110	EUC48930	6.47e-110	.	.	.	.	GO:0045493	xylan catabolic process	GO:0031176	endo-1,4-beta-xylanase activity	GO:0005615	extracellular space	.	.	.
Boip_TRINITY_DN53164_c0_g1	5.4529	0.00283895	5.2409	0.00169445	XYNA_THEAU	7.04e-146	Endo-1,4-beta-xylanase	3810_g	0	EUC46221	0	PF00331.21	Glycosyl hydrolase family 10	.	.	GO:0045493	xylan catabolic process	GO:0031176	endo-1,4-beta-xylanase activity	.	.	.	.	.
Boip_TRINITY_DN52332_c0_g1	11.7559	3.64e-23	12.4372	4.84e-30	XYN6_MAGO7	4.46e-165	Endo-1,4-beta-xylanase 6	8738_g	0	EUC40439	0	PF00734.19|PF00331.21	Fungal cellulose binding domain|Glycosyl hydrolase family 10	sigP:1	KEGG:mgr:MGG_02245|KO:K01181	GO:0045493	xylan catabolic process	GO:0030248|GO:0031176	cellulose binding|endo-1,4-beta-xylanase activity	GO:0005576	extracellular region	0.792882	.	.
Boip_TRINITY_DN16461_c0_g1	13.2418	2.1e-126	11.0876	1.77e-104	CUTI_PYRBR	3.85e-29	Cutinase	5898_g	1.2e-133	EUC45816	1.22e-133	PF01083.23|PF08237.12	Cutinase|PE-PPE domain	.	.	.	.	GO:0050525	cutinase activity	GO:0005576	extracellular region	0.920923	.	.
Boip_TRINITY_DN90318_c0_g1	6.23832	1.08e-09	10.4156	5.01e-35	AXE2_TALPU	3.55e-11	Acetylxylan esterase 2	6588_g	2.93e-151	EUC44646	7.33e-43	PF01083.23	Cutinase	.	.	GO:0030245|GO:0045493	cellulose catabolic process|xylan catabolic process	GO:0046555	acetylxylan esterase activity	GO:0005576	extracellular region	.	0.818911	.
Boip_TRINITY_DN94565_c0_g1	6.39536	1.3e-39	6.01258	1.64e-69	AXE2_TALPU	3.31e-12	Acetylxylan esterase 2	1927_g	1.68e-156	EUC44880	1.57e-156	PF01083.23	Cutinase	.	.	GO:0030245|GO:0045493	cellulose catabolic process|xylan catabolic process	GO:0046555	acetylxylan esterase activity	GO:0005576	extracellular region	0.915414	.	.
TRINITY_DN3937_c0_g1	1.96743	3.6e-08	2.09441	1.25e-18	AXE2_TALPU	1.74e-12	Acetylxylan esterase 2	8788_g	0	EUC44646	3.66e-24	PF01083.23	Cutinase	sigP:1	.	GO:0030245|GO:0045493	cellulose catabolic process|xylan catabolic process	GO:0046555	acetylxylan esterase activity	GO:0005576	extracellular region	.	.	.
TRINITY_DN15418_c0_g1	2.46224	9.13e-07	3.94568	5.34e-65	SOL5_ALTSO	3.12e-49	Bifunctional solanapyrone synthase	10246_g	0	EUC42951	0	PF01565.24	FAD binding domain	.	KEGG:ag:BAJ09785|KO:K20550	GO:0009405	pathogenesis	GO:0071949|GO:0016853|GO:0016491	FAD binding|isomerase activity|oxidoreductase activity	.	.	.	.	.
Boip_TRINITY_DN81971_c0_g1	-0.149191	0.711855	3.75387	3.14e-22	SIRO_LEPMC	2e-68	Oxidoreductase sirO {ECO:0000303	5491_g	0	EUC41670	0	PF00248.22	Aldo/keto reductase family	.	.	GO:0009405	pathogenesis	GO:0016491	oxidoreductase activity	.	.	.	0.886446	.
TRINITY_DN20858_c0_g1	0.655702	0.113918	2.15564	1.37e-11	SIDH_ASPFU	2.36e-72	Mevalonyl-coenzyme A hydratase sidH	3359_g	0	EUC40461	0	PF00378.21|PF16113.6	Enoyl-CoA hydratase/isomerase|Enoyl-CoA hydratase/isomerase	.	KEGG:afm:AFUA_3G03410|KO:K22150	GO:0070301|GO:0010106|GO:0006696|GO:1900551|GO:0009405	cellular response to hydrogen peroxide|cellular response to iron ion starvation|ergosterol biosynthetic process|N',N'',N'''-triacetylfusarinine C biosynthetic process|pathogenesis	GO:0016853|GO:0016829	isomerase activity|lyase activity	GO:0005777	peroxisome	.	.	.
TRINITY_DN21751_c0_g1	0.0803973	0.887616	2.72424	5.19e-36	SIRQ_LEPMC	7.48e-67	Short chain dehydrogenase sirQ	10457_g	0	EUC46581	0	.	.	.	.	GO:0009405	pathogenesis	GO:0016491	oxidoreductase activity	.	.	.	.	.
TRINITY_DN11131_c0_g1	0.141245	0.664652	0.714823	3.95e-07	CXT1_CRYNJ	4.55e-41	Beta-1,2-xylosyltransferase 1	3655_g	0	EUC49414	0	PF05686.13	Glycosyl transferase family 90	.	KEGG:cne:CNL04750|KO:K11702	GO:0045227|GO:0006688|GO:0009405	capsule polysaccharide biosynthetic process|glycosphingolipid biosynthetic process|pathogenesis	GO:0035252	UDP-xylosyltransferase activity	GO:0016021	integral component of membrane	.	.	.
TRINITY_DN26366_c0_g1	1.45363	9.31e-07	2.15393	9.59e-20	.	.	.	1700_g	1.06e-81	EUC49233	4.58e-77	PF11160.9	Hypervirulence associated proteins TUDOR domain	.	.	.	.	.	.	.	.	0.778903	.	.
Boip_TRINITY_DN84211_c0_g1	7.52363	5.63e-28	6.91711	1.04e-133	DOTB_DOTSN	6.72e-22	Dothistromin biosynthesis peroxidase dotB	6667_g	2.24e-148	EUC45107	2.29e-148	PF01328.18	Peroxidase, family 2	.	.	.	.	GO:0046872|GO:0004601	metal ion binding|peroxidase activity	.	.	.	.	.
References:
i Log2 fold change = logarithm in base 2 of the gene expression fold changes when comparing the fungus grown in planta and in vitro; p-value adj = probability value adjusted for multiple tests (Benjamini-Hochberg false discovery rate estimation (Storey and Tibshirani, 2003))
ii B. oryzae = Bipolaris oryzae sequence match to the draft genome of B. oryzae Cm_TG12Lb2 (Castell-Miller et al., 2016)
iiiB. oryzae ATC44560= Bipolaris oryzae sequence match to the draft genome of B. oryzae ATC44560 isolate (Condon et al., 2013); JGI = Join Genome Institute (https://jgi.doe.gov/)
ivEffector prediction by EffectorP; A= apoplastic; C = cytoplasmic (Sperschneider and Dodds, 2021)
v Genes explaining ≥ 75% of the variation due to treatmets or treatments by time interaction
vi Predicted effector with low gene expression
